# Supplementary material for: Increased Inflammation and Cardiometabolic Risk in Individuals with Low AMY1 Copy Numbers
Source: PubMed Central journal article supplement (PMC6463254; doi:10.3390/jcm8030382), 2019-03-19
Supplement: jcm-08-00382-s001.pdf [file jcm-08-00382-s001.pdf]

MS: JCM-454190: Increased inflammation and cardiometabolic risk in individuals with low *AMY1* copy numbers

**Supplementary Table 1.** Daily macronutrient intake of low and high *AMY1* CNV groups.

| Macronutrient         | Low <i>AMY1</i><br>(n=29) | High <i>AMY1</i><br>(n=28) | <i>P</i> |
|-----------------------|---------------------------|----------------------------|----------|
| Starch (g/day)        | 145.5 ± 43.6              | 150.3 ± 59.6               | 0.8      |
| Protein (g/day)       | 92.6 ± 22.8               | 89.9 ± 46.5                | 0.8      |
| Total Fat (g/day)     | 83.5 ± 24.2               | 68.9 ± 32.7                | 0.1      |
| Saturated Fat (g/day) | 30.6 ± 10.7               | 24.8 ± 12.8                | 0.1      |
| Total Energy (kJ/day) | 8792.2 ± 2224.3           | 8016.89 ± 2897.0           | 0.3      |

Data are expressed as mean ± SD. Low *AMY1* group is defined as ≤4 copies and high *AMY1* group as >4 copies. Differences between groups were analysed using independent Student's *t*-tests. Variables which did not fit a normal distribution were log-transformed to the base 10 to approximate normality prior to analysis.
